# Supplementary material for: Neutrophil-mediated fibroblast-tumor cell il-6/stat-3 signaling underlies the association between neutrophil-to-lymphocyte ratio dynamics and chemotherapy response in localized pancreatic cancer: A hybrid clinical-preclinical study
Source: eLife journal article supplement (doi:10.7554/elife.78921), 2022-09-15
Supplement: supp [file Figure 1-Appendix 2 Table 1&3-SOURCE DATA.xlsx]

## Sheet: NAC NLR database
Pt ID	Diagnosis Total leukocyte count (/uL)	Diagnosis Neutrophil count (%)	Diagnosis Lymphocyte count (%)	Diagnosis Eosinophil count (%)	Diagnosis Monocyte count (%)	Diagnosis Immature granulocyte count (%)	DiagnosisPlatelet count (10^3)	Diagnosis Albumin	Diagnosis Ca19-9	Surgery Total leukocyte count (/uL)	Surgery Neutrophil count (%)	Surgery Lymphocyte count (%)	Surgery Eosinophil count (%)	Surgery Monocyte count (%)	Surgery Immature granulocyte count (%)	Surgery Platelet count (10^3)	Surgery Albumin	Surgery Ca19-9	ECOG Status (0=ECOG-0, 1=ECOG-1, 2=ECOG-2, 99=unk)	Resectability Status 0=resectable, 1=borderline, 2=locally advanced	Neoadjuvant Chemotherapy (0=no, 1=yes)	CAP Neoadjuvant Therapy Response (0=0_Complete, 1=1_NearComplete,2=2_partial response,3=3_poor/noresponse)	Local Recurrence? (0=no, 1=y)	Date Local Recurrance	Distant Recurrence? (0=no,1=y)	Date Distant Recurrence	Disease Status (0=NED, 1=EOD)	Vital Status (0=Alive, 1=Dead)	Date of Death/Date of last follow-up
1	8.6	63.6	27	1.3	7.9		188	4.1	369	6.4	69.3	20.3	1.3	8	0.5	118	4.1	18.2	1	2	1	2	0		1	2018-10-23	1	0	2021-02-04
2	7.2	71.5	19.7	2.2	6.3	0.2	173	4	7	6.3	53.6	33.3	3.3	9.1	0.2	172	3.8	7.9	1	1	1	3	1	2020-01-15	1	2020-01-15	1	0	2020-09-14
3	8.4	69.2	22.3	3.7	4.6	0.5	245	3.8	4.9	9.7	70.3	22	0.7	5.6	1	225	4.2	6.2	1	1	1	3	1	2018-06-06	1	2018-07-03	1	1	2018-07-03
4	8.8	63.1	26	3.1	7.1	0.2	275	4.1	160	4.3	54.7	29.7	2.1	13.1	0.2	109	4	12.2	1	0	1	1	0		0		0	0	2021-01-26
5	8.3	63.7	28.4	2.3	5	0.2	217	3.4	259.3	8.5	66.1	24.2	0.5	8.5	0.2	228	4.1	24.9	1	1	1	2	1	2019-04-24	1	2018-10-15	1	1	2020-10-10
6	5.6	67.4	22.7	1.6	7.6	0.2	372	4.9	197	3.2	69.3	22.6	0.3	7.5	0.2	77	4.7	42.7	1	1	1	3	1	2018-05-15	1	2018-11-30	1	1	2019-05-14
7	9.2	70.3	22.5	3.6	7	0.4	321	4.4	1318	5.6	65.6	24.8	2.2	9.3	0.2	198	4.1		1	1	1	2	0		0		0	1	2019-01-06
8	10.4	54.7	32.8	1.3	9.8	0.1	276	4.5	14	7.1	54	30.8	2.2	11.4	0.6	229	3.8		0	1	1	2	0		0		0	0	2020-12-04
9	6.3	62.4	20.7	3.5	11.9	0.5	136	3.8	264	4.5	60	19	1	12	0.8	113	3.7	23.9	0	1	1	2	1	2019-07-17	1	2019-11-12	1	1	2020-05-26
10	8.3	67.4	18.5	2.4	9.7	0.7	243	4.1	3	7.9	66.7	22.5	1.1	6.8	0.8	114	3.9	0	1	0	1	2	0		1	2020-05-29	1	0	2021-02-04
11	6.5	61	26.5	4	7.9	0.5	259	4.4	148	4.2	58.1	27.9	1	11.1	0.2	155	4.4	17.9	0	1	1	2	1	2018-05-15	1	2018-08-17	1	1	2019-08-25
12	4.6	65.1	22.5	5.1	6.6	0.4	305	3.8	44	4.8	55.4	28.6	7.4	7.8	0.2	235	4	39	0	2	1	1	1	2018-08-13	1	2020-07-15	1	1	2020-09-15
13	4.3	74.2	19.4	1.6	10.6	0.7	224	4.3	58.2	5.6	68	23.8	2	13.3	0.3	106	4.1	19.6	0	2	1	2	1	2020-02-15	1	2020-05-20	1	0	2020-10-02
14	5.4	71.2	16.9	4	9.4	0.5	129	4.3	3000	8.7	70.4	17.7	2	6.8	0.4	89	4	1600	1	1	1	3	0		1	2018-03-13	1	1	2018-06-12
15	6.6	60.3	29.6	3.6	5.9	0.6	215	4.4	6.9	5.1	63.4	23.4	1	11.6	0.4	196	4.3	20	1	1	1	2	0		1	2020-05-21	1	0	2021-02-03
16	10.8	78.3	13.5	1.1	6.5	0.3	411	4.4	210	7.3	69.5	19.8	2.5	10.9	0.05	192	4.7	169	1	1	1	3	0		1	2019-05-03	1	1	2020-01-19
17	9.7	69	21	3.3	6.9	0.9	250	4	38	7.7	64	28	2	6	0.5	245	3.4	16.7	1	2	1	2	0		1	2020-09-24	1	0	2021-01-12
18	5.5	50	34.5	4.2	10.2	0.5	174	3.8		5.3	53.2	32.3	1.6	10.6	0.7	88		10.3	1	1	1	1	0		1	2019-01-18	1	0	2021-02-07
19	6.6	69	17.5	1.8	11.2	0.3	266	3.2	26.2	6.2	66.7	16.3	3.5	12.9	0.3	161	3.7	15	2	1	1	3	1	2017-08-02	1	2017-09-12	1	1	2017-12-01
20	9.2	70	13	2.1	9	0.2	159	4.6	176	11.5	84	9	2.1	7	1	98		341.9	1	2	1	3	0		1	2016-12-05	1	1	2017-01-26
21	8.8	68	18.4	1.8	5.4	0.2	223		13000	8.3	71.4	19.1	1.7	5.4	0.6	145	3.7	3189	0	2	1	3	1	2017-04-13	0		1	0	2017-04-13
22	4.4	59.1	32.3	2.7	5.5	0.5	231	3.6	145	6.6	51.9	37.3	3.5	5.9	0.8	330	3.6	53.8	2	2	1	2	0		0		0	0	2021-02-04
23	9.6	69.7	23.2	0.9	5.8	0.7	379	4.6	351	4.6	45.1	31.7	2.6	19.7	0.9	220	3.9	107	0	1	1	2	0		0		0	0	2021-01-26
24	9.2	62.9	27	0.7	8.9	0.7	390	4.3	102.7	8.2	60	26	3.4	13	0.6	147	3.9	19.7	1	2	1	2	0		0		0	0	2016-01-01
25	6.3	73.7	13.4	0.8	6.3	0.5	153		314.1	8.7	71	14.5	1.8	11.7	0.4	287			0	1	1	3			1	2019-04-19	1	1	2019-07-26
26	4.8	60	20	1	15	0.4	120	4.2	192	5.7	68	18.6	1.9	10.6	0.4	178	4.3	7	0	1	1	2	0		1	2020-06-15	1	1	2019-01-08
27	10.5	52.5	28.6	12.4	5.5	0.5	197	3.9	327	4.1	58	23.2	7.3	10.3	0.5	165	4.1	91	0	1	1	2	0		1	2019-02-15	1	0	2021-02-02
28	6.1	72.9	15.8	2.1	8.2	0.3	252	4.5	25	7.2	61.9	17.8	3.3	11.3	0.3	203	4	7.4	0	0	1	3	1	2020-03-26	1	2020-03-26	1	1	2020-06-05
29	7.2	72.1	16.3	4.2	7	0.6	172	4.1	261.3	10.2	74.4	16.5	1.7	7.1	0.6	168	4.5	24.8	0	2	1	2	0		0		0	1	2016-01-07
30	8	79.9	14.8	1	4.1	0.3	242	4.5	320.6	9.5	86	9.4	0.3	3.9	0.5	183	4.3	88.5	0	1	1	3	0		1	2016-07-07	1	1	2017-06-23
31	10.1	51.8	36.1	3.2	7.7	0.8	319	3.4	2651	8.4	67.7	21.3	1.3	9	0.7	330	3.1	53.8	1	1	1	2	0		1	2015-11-09	1	1	2016-03-13
32	7.2	70.1	20.4	6.4	2.5	0.7	362	3.5	330	10.6	48.6	41.7	1.7	7.5	0.8	186	3.2	483	2	2	1	1	1	2016-01-29	1	2016-02-03	1	1	2016-10-15
33	9.8	62.6	23.9	4.7	8	0.3	296	4.4	2.4	9.9	52	21	1	18	0.9	209	4	1.5	0	0	1	2	0		1	2018-11-14	1	1	2019-09-14
34	9	72.5	14.9	2.6	9.3	0.6	263	5	132.7	7.3	66.5	15.4	2.7	15	0.7	213	4.4	100.8	0	2	1	2			1	2018-02-15	1	1	2018-11-06
35	9.3	68.2	16.8	0.8	5.4	1	274	4.3	1064	11.3	71	13	1	2	1.5	187	4.1	27.7	0	2	1	3	1	2017-09-19	1	2017-09-19	1	1	2017-10-01
36	8	63.6	22.5	1.4	7	0.5	198	3.7	2	9.1	68.4	23.1	2.2	9	0.5	136		2	1	1	1	2	0		1	2019-07-15	1	1	2019-07-15
37	6.7	65.3	19.3	4.5	10.3	0.3	213	3.5	89.9	6.2	61.7	17.8	7.2	12.4	0.3	181	3.4	27	0	1	1	2	0		1	2019-04-15	1	1	2020-05-04
38	7.3	56.3	34.7	1.9	6.3	0.1	215	4.9	747	8.8	63.7	24.7	2.1	8.3	0.3	164	3.3	23.9	0	2	1	2	0		1	2019-04-15	1	0	2021-02-05
39	5	62.8	22	6.3	8.1	0.4	149	3.8	58.2	4.3	55.9	26.6	1.6	12.4	0.9	108	3.6	68	0	1	1	2	0		1	2018-10-17	1	1	2019-02-19
40	6.1	69	17.5	0.2	13		189	4.4	18.3	10.9	69	12.5	0.9	2	0.7	132	2.9	11.2	1	1	1	3			1	2018-05-15	1	1	2018-10-17
41	6.5	56.1	29.6	2.4	11.3	0.2	245	3.7	19.1	5.5	62.2	21.5	1.8	13.6	0.5	211	3.6	10.6	1	2	1	1	1	2018-07-15	0	2019-01-15	1	1	2019-09-11
42	7	50.6	41.6	2	5.6	0.2	188	4.4	146	6	62	27.3	2	8	0.3	246	2.6	95.9	1	0	1	2	0		1	2017-02-15	1	1	2017-04-03
43	8.8	71.3	21.8	1.8	4.9	0.5	321	3.5	53	9.2	63.2	28.8	2.1	5.5	0.2	213	3.5	11	1	1	1	2	0		0		0	0	2018-05-02
44	5.9	60	29	4	6	0.3	248	4	2170	5.1	64	21	6.1	7.3	0.6	111	4.2	45	1	2	1	2	0		0		0	0	2021-02-04
45	7.6	65.3	22.3	3.5	9.2	0.4	213	4.2	38	8.3	59.8	31.5	1.9	5.4	0.1	198	3.6	11.6	1	1	1	2	0		1	2019-03-15	1	0	2019-04-26
46	5.4	71.6	19.6	1	9	0.4	146	3.3	67.7	7.7	74.9	18.1	0.8	5.8		179	3.8	98.9	1	2	1	3	0		1	2016-07-08	1	1	2017-06-18
47	8.5	71	12	0.9	9		382	3.9	275.4	6.5	73.6	15.6	0.1	9	0.8	159	2.4	122.9	1	1	1	3	0		0		0	1	2018-06-23
48	7	64	26	2	7	0.2	477		409.7	4.6	63.7	24.5	2.2	8.5	0.4	274			0	1	1	2	1	2019-06-15	0		1	1	2020-04-07
49	5.6	78	19	2.3	9.6	0	254	4.8	207.6	9	69	16	0.9	10		236	4.2	28.4	2	0	1	3	0		0		0	0	2020-12-30
50	6.3	68.9	18	1	8.3	0.3	307	3.4	4828	6	71	17	3.1	8.4	0.2	167	4.3	522	2	2	1	3	1	2019-03-14	1	2019-03-14	1	1	2019-06-21
51	6.5	63.9	26.3	1.4	7.8	0.3	180	4.2	3800	5.6	57.1	26.5	4	10.4	0.1	198	4.1	104.9	1	1	1	2	0		1	2019-10-04	1	1	2020-07-31
52	7.9	61	26	3	8	0.4	269	4.2	31	7.7	46	37	1	15	0.3	235	4	69.9	1	1	1	2	0		1	2018-10-10	1	1	2018-12-06
53	7.4	51.9	30	7.3	9.9	0.5	268	3.9	76	5.3	36.2	38.3	14.3	10.2	0.5	182	3.7	6.2	1	1	1	1	0		0		0	0	2021-02-05
54	6.8	74.8	12.2	4.8	8.2	0.3	231	4.7	1081	7.4	44.7	38.9	3.5	12.4	0.1	275	4.5	16	1	1	1	2	1	2017-11-27	1	2018-11-17	1	1	2018-12-06
55	6.6	65.3	20.5	4.1	9.3	0.3	266	3.7	1.1	5.6	63.3	25.4	2.3	7.9	0.2	196	4.2	0.9	0	2	1	2	0		0		0	0	2021-01-26
56	4.6	50	31.5	0.2	15.4	0.1	185	4.2	16	5.7	47.1	27.8	5.6	18.6	0.1	217	4.1	10	0	0	1	1	0		0		0	0	2021-01-11
57	7.8	73	21.3	0.9	5.6	0.2	209	3.2	4602	7.9	69	18.9	2.8	9.1	0.4	183		265	1	1	1	3	1	2020-02-24	1	2020-02-24	1	0	2020-03-04
58	3.7	47	38	1	14	0.3	158	4	205	6.8	49.2	36.5	4.8	9.3	0.2	198	4	18	2	1	1	2	0		1	2018-10-15	1	1	2019-03-04
59	5.6	68.4	19.8	2.4	9.4	0.2	212		212	4.5	49.8	35.6	4.5	9.6	0.3	245		8.4	2	1	1	1	0		0		0	0	2018-11-20
60	10.4	71.1	16.8	1.8	8.8	0.5	252	4.1	369.3	8.9	60	24	2	9	0.4	315	2.9	32.5	2	1	1	2	0		1	2019-10-15	1	0	2020-08-07
61	6.1	64	12	3	9.4	0.6	226	4.3	103	4.6	82	11	0.2	4.3	0.9	198	3.9	20.6	1	1	1	3	0		1	2020-02-27	1	0	2019-08-22
62	6.4	48.2	39.4	6.9	4.9	0.4	274	4.6	7.4	5.7	56.4	32.6	5.8	4.6	0.4	227	4.2	0.7	1	1	1	2	0		0		0	0	2021-02-05
63	7.2	64.4	24.9	1.4	7.7	0.1	287	4.1	223.9	4.3	58	33	1	7	0.6	260	4.2	80.1	1	0	1	2	0		0		0	0	2021-02-02
64	7.3	72	18	2	4	0.4	223	4.5	365.6	10.2	66.7	17.9	1.4	11	0.4	113	4.2	50	1	1	1	3	0		0		0	0	2019-05-21
65	8.3	69.5	12.8	1.8	7.6	0.2	198	4.1	186	9.9	77.3	12.4	2	9.9	0.3	172	4.5	76	1	1	1	3	0		1	2020-11-30	1	0	2021-01-08
66	7.2	66.3	19.2	1.4	8	0.5	221	4	28	9.2	71.1	17.8	3.6	8.3	0.6	159	4.2	28	1	2	1	3	0		0		0	1	2019-07-30
67	9.9	71.9	13.8	5.7	7.8	0.3	190	3.9	4793	7.6	57.3	20.3	4.2	17.2	0.3	145	2.8	231	0	1	1	2	0		1	2019-12-31	1	0	2020-11-20
68	4.7	65.3	19.8	3.2	10.7	0.4	304	4.4	205	5.6	57.4	22.5	5.1	10.8	0.2	305	3.8	110	0	0	1	2	0		1	2020-02-26	1	0	2021-02-04
69	5.5	65.9	21.6	2.7	9.1	0.2	217	4.6	728.9	7.7	63.2	26.7	1.4	7.7	0.5	251	3.6	81	1	1	1	2	0		0		0	0	2021-02-04
70	9.4	68.4	17.8	3.4	6.9	0.8	328	3.3	74.6	8.7	72.5	17.3	3.1	6.6	0.3	251	3	58.9	0	0	1	3	0		0		0	0	2020-12-28
71	5.6	64.3	23.7	4.3	7	0.2	315	3.9	417.1	8.4	65.3	24.5	3.4	5.4	0.2	312	3.7	90	1	0	1	2	0		1	2020-02-04	1	0	2020-11-19
72	9.9	69.3	23.4	2.3	4.5	0.5	289	4	139	7.6	61.5	26.7	3.4	8.7	0.3	213	3.2	10	1	0	1	2	0		0		0	0	2020-07-30
73	9.8	66.3	26	1.2	5.6	0.5	285	3.7	233	8.7	65.4	25.7	2.3	7.8	0.2	219	3.6	497	1	0	1	2	0		1	2020-02-12	1	1	2020-07-12
74	8.3	63.9	25.8	1.3	7.6	0.1	312	4.5	1490	5.3	50.4	38	2.7	6.8	0.1	200	4.1	79.5	1	0	1	1	0		0		0	0	2021-01-23
75	9.8	63	28	1	8	0.3	386	4	30	9.9	58.2	30.9	2.8	7.4	0.3	202	2.2	20	1	0	1	2	0		1	2020-04-20	1	1	2020-08-20
76	5.9	64.3	27.5	1	5.9	0.3	189	4.8	110.4	6	61.2	31.3	1.4	5	0.1	201	4.3	18.1	0	1	1	1	1	2020-07-27	0		1	0	2021-01-23
77	8.5	64.6	16.8	6	11.3	0.1	232	4.4	3	7	55.5	21.8	8.4	12.9	0.3	200	3.9	0	0	2	1	2	0		1	2020-10-30	1	0	2021-01-19
78	7.6	68.9	20.3	2.3	6.7	0.2	219	4.4	21	5.6	71.3	22.3	1	5	0.2	245	3.7	21	0	1	1	2	0		0		0	0	2019-12-07
79	8.8	80.7	9.5	3.3	6	0.5	217	4	7759	9.6	77	13.4	3.5	5.4	0.2	654	4.5	127	0	0	1	3	0		1	2020-04-20	1	0	2021-02-01
80	5.7	42.2	48.6	1.7	7	0.2	194	3.8	579.4	4.9	49.5	37	3.3	9.4	0.1	184	3.4	140	1	0	1	2	0		0		0	0	2020-11-27
81	6.9	62	27	3	8	0.2	427	3.7	61	4.2	43.9	39.9	1.2	9	0.2	105	3.4	27.3	1	0	1	2	0		0		0	0	2021-01-12
82	7.2	61.9	24.7	4.6	8	0.1	282	4.6	74.3	7.8	62.5	20.6	7.5	8.6	0.3	230	4.9	22	1	1	1	2	0		0		0	0	2021-01-05
83	6.2	68	31	1.1	7.6	0.5	237	4.7	68.5	5.2	69.9	20.1	1.7	7.7	0.4	174	4.1	40.8	0	1	1	2	0		1	2020-09-17	1	0	2021-01-23
84	7.8	64.3	22.6	3.4	8.3	0.3	217	3.4	3191	6.7	49.7	35.6	3.4	7.9	0.4	245	3.3	58	0	1	1	1	0		0		0	0	2020-07-07
85	6.9	59.2	28.9	2.3	6.7	0.3	187	4.4	130	5.6	61.3	31.2	1.3	6.7	0.3	212	3.9	10	1	2	1	2	0		0		0	0	2020-11-18
86	9.9	63.7	23.3	3.4	5.9	0.2	345	4.6	261	7.8	62.3	28.7	1.2	5.9	0.8	312	3.1	154	1	1	1	2	0		0		0	0	2020-09-03
87	8.4	71.9	18.7	1	7.5	0.4	307	3.9	280.7	7	72.6	18.3	1	7.2	0.3	286	3.9	49.4	0	0	1	3	0		1	2021-01-21	1	0	2021-02-08
88	8.3	72.1	16.5	2.1	8.1	0.5	280	4.6	209.7	4.2	49.7	24.8	6.2	17.2	0.5	245	4.1	161	1	1	1	2	0		0		0	0	2021-01-12
89	8.7	65.4	19.7	2.3	8.5	0.2	243	4.3	110	6.6	69.9	16.4	5	7.8	0.2	125	4.2	2	0	2	1	3	0		0		0	0	2020-11-19
90	5.6	68	15.6	3.6	9	0.5	219	4.5	16.6	7.8	71.3	14.7	5	12.1	0.5	189	4.3	9	1	2	1	3	0		1	2020-07-03	1	0	2020-08-10
91	7.6	61.7	24.5	3.4	8.1	0.2	198	3.5	884.8	6.5	60.9	25.3	2.3	10.1	0.2	146	3.8	28.8	0	0	1	2	0		0		0	0	2020-11-15
92	6.7	69	23	4	8	0.1	416	3.8	362	9.1	74.2	14.7	0.7	10	0.2	211	3.8	74.6	2	0	1	3	0		1	2020-10-02	1	0	2021-02-08
93	7.2	58.4	29.6	1.3	6.7	0.1	290	3.6		7.7	54.3	34.5	1.9	6.1	0.4	216	3.1		0	1	1	1	0		0		0	0	2021-01-14
94	7.4	61.4	26.3	2.7	8.4	0.4	290	4.4	46.8	6	45.9	37.3	4	11.8	0.3	205	3.8	15.7	0	1	1	2	0		0		0	0	2021-02-08

## Sheet: Sheet1
CAP 0-2			CAP 3
N	L	NLR	N	L	NLR
63.6	27	2.35556	71.5	19.7	3.62944
63.1	26	2.42692	69.2	22.3	3.10314
63.7	28.4	2.24296	67.4	22.7	2.96916
70.3	22.5	3.12444	71.2	16.9	4.21302
54.7	32.8	1.66768	78.3	13.5	5.8
62.4	20.7	3.01449	69	17.5	3.94286
67.4	18.5	3.64324	70	13	5.38462
61	26.5	2.30189	68	18.4	3.69565
65.1	22.5	2.89333	73.7	13.4	5.5
74.2	19.4	3.82474	72.9	15.8	4.61392
60.3	29.6	2.03716	79.9	14.8	5.39865
69	21	3.28571	68.2	16.8	4.05952
50	34.5	1.44928	69	17.5	3.94286
59.1	32.3	1.82972	71.6	19.6	3.65306
69.7	23.2	3.00431	71	12	5.91667
62.9	27	2.32963	78	19	4.10526
60	20	3	68.9	18	3.82778
52.5	28.6	1.83566	73	21.3	3.42723
72.1	16.3	4.42331	64	12	5.33333
51.8	36.1	1.4349	72	18	4
70.1	20.4	3.43627	69.5	12.8	5.42969
62.6	23.9	2.61925	66.3	19.2	3.45312
72.5	14.9	4.86577	68.4	17.8	3.8427
63.6	22.5	2.82667	80.7	9.5	8.49474
65.3	19.3	3.38342	71.9	18.7	3.84492
56.3	34.7	1.62248	65.4	19.7	3.3198
62.8	22	2.85455	68	15.6	4.35897
56.1	29.6	1.89527	69	23	3
50.6	41.6	1.21635
71.3	21.8	3.27064
60	29	2.06897
65.3	22.3	2.92825
64	26	2.46154
63.9	26.3	2.42966
61	26	2.34615
51.9	30	1.73
74.8	12.2	6.13115
65.3	20.5	3.18537
50	31.5	1.5873
47	38	1.23684
68.4	19.8	3.45455
71.1	16.8	4.23214
48.2	39.4	1.22335
64.4	24.9	2.58635
71.9	13.8	5.21014
65.3	19.8	3.29798
65.9	21.6	3.05093
64.3	23.7	2.71308
69.3	23.4	2.96154
66.3	26	2.55
63.9	25.8	2.47674
63	28	2.25
64.3	27.5	2.33818
64.6	16.8	3.84524
68.9	20.3	3.39409
42.2	48.6	0.868313
62	27	2.2963
61.9	24.7	2.50607
68	31	2.19355
64.3	22.6	2.84513
59.2	28.9	2.04844
63.7	23.3	2.73391
72.1	16.5	4.3697
61.7	24.5	2.51837
58.4	29.6	1.97297
61.4	26.3	2.3346
